# Supplementary material for: Expanding the Knowledge Related to Flavors and Fragrances by Means of Three-Dimensional Preparative Gas Chromatography and Molecular Spectroscopy
Source: MDPI journal article supplement (doi:10.3390/separations9080202), 2022-08-04
Supplement: s1 [file s1]

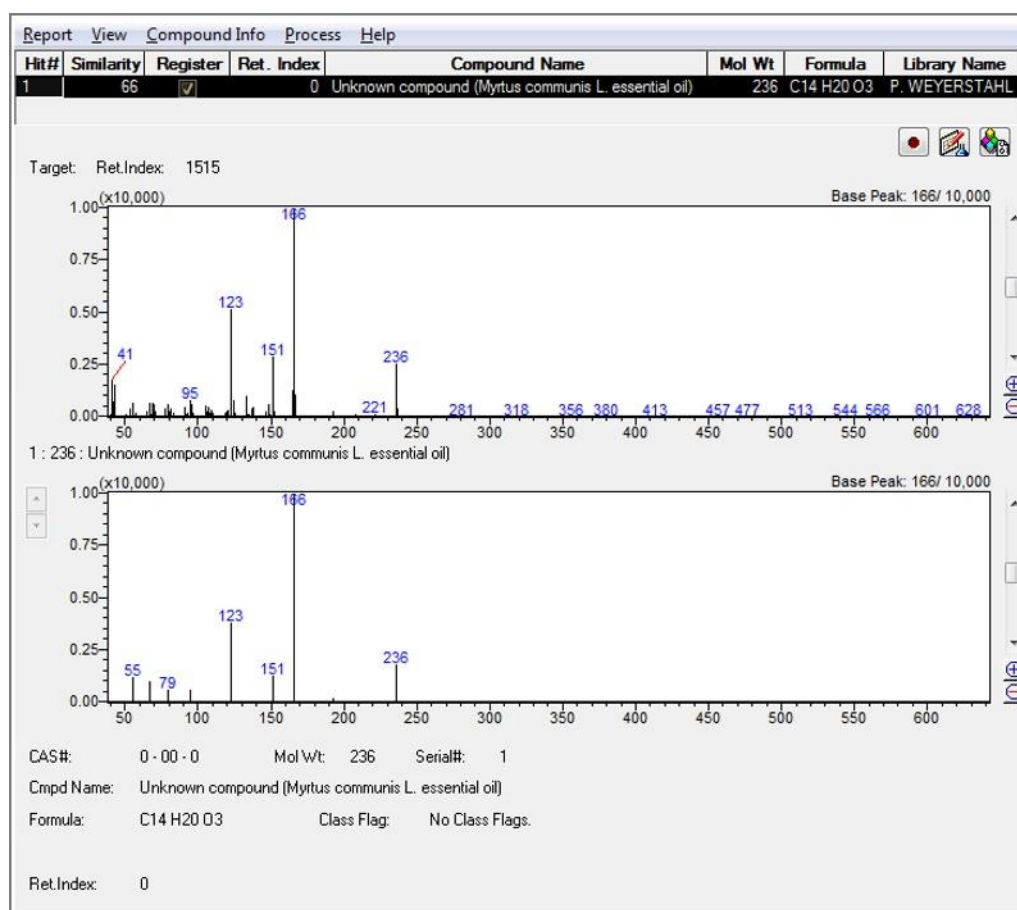

**Figure S1.** MS similarity result of the unknown spectrum against the spectrum built with the main ion fragments reported by ref. [30].
